# Supplementary material
Source: PubMed Central journal article supplement (PMC4104055)
Supplement: mmc1.pdf [file mmc1.pdf]

## Supporting Material

### **Macromolecular crowding effects on two homologs of ribosomal protein S16: Protein-dependent structural changes and local interactions**

Therese Mikaelsson, Jörgen Ådén, Pernilla Wittung-Stafshede\* and Lennart B.-Å. Johansson\*

*Department of Chemistry, Umeå University, 90187 Umeå, Sweden*

\*Corresponding authors: [lennart.johansson@chem.umu.se](mailto:lennart.johansson@chem.umu.se); [pernilla.wittung@chem.umu.se](mailto:pernilla.wittung@chem.umu.se)

#### **Content:**

Tables S1-S3

Figures S1-S5

**Table S1** Effects of dextran 20 on S16<sub>Meso</sub> WT thermodynamic stability, measured at three fixed different temperatures using urea-induced denaturation.

| Temperature (°C) | Buffer<br>$\Delta G_u^\circ$ (kJ mol <sup>-1</sup> ) | Dextran 20 (200 mg/mL)<br>$\Delta G_u^\circ$ (kJ mol <sup>-1</sup> ) | $\ln(K_{u \text{ crowd}}/K_{u \text{ buff}})^*$ |
|------------------|------------------------------------------------------|----------------------------------------------------------------------|-------------------------------------------------|
| 10               | 9.8 ± 0.7                                            | 12.2 ± 1.1                                                           | 1.0                                             |
| 25               | 14.0 ± 1.0                                           | 15.1 ± 1.2                                                           | 0.5                                             |
| 40               | 9.4 ± 1.8                                            | 12.1 ± 2.0                                                           | 1.0                                             |

\*  $\ln K_u = -\Delta G_u^\circ/RT$

**Table S2** Quantum yields and average fluorescence lifetimes of BODIPY .

| [Dextran]<br>(mg/mL) | W74F/F10C |                           | W74C   |                           | W39F/Q10C |                           | W39F/K74C |                           | W39F/Y81C |                           |
|----------------------|-----------|---------------------------|--------|---------------------------|-----------|---------------------------|-----------|---------------------------|-----------|---------------------------|
|                      | $\phi$    | $\langle\tau\rangle$ (ns) | $\phi$ | $\langle\tau\rangle$ (ns) | $\phi$    | $\langle\tau\rangle$ (ns) | $\phi$    | $\langle\tau\rangle$ (ns) | $\phi$    | $\langle\tau\rangle$ (ns) |
| <b>0</b>             | 0.66      | 5.9                       | 1.04   | 6.1                       | 1.00      | 6.2                       | 1.10      | 6.0                       | 0.30      | 6.1                       |
| <b>50</b>            | 0.57      | 5.8                       | 0.97   | 6.1                       | 0.98      | 6.1                       | 0.93      | 6.0                       | 0.33      | 6.1                       |
| <b>100</b>           | 0.51      | 5.8                       | 0.82   | 6.1                       | 0.97      | 6.1                       | 1.09      | 6.0                       | 0.27      | 6.0                       |
| <b>200</b>           | 0.52      | 5.7                       | 0.62   | 5.9                       | 0.91      | 6.0                       | 0.90      | 5.9                       | 0.30      | 5.9                       |
| <b>300</b>           | 0.58      | 5.6                       | 0.79   | 5.9                       | 0.76      | 5.9                       | 0.97      | 5.9                       | 0.27      | 5.8                       |

The quantum yield ( $\phi$ ) together with the average fluorescence lifetime ( $\langle\tau\rangle$ ) of BODIPY for the two S16<sub>Thermo</sub> variants; W74C/F10C and W74C and three S16<sub>Meso</sub> variants; W39F/Q10C, W39F/K74C and W39F/Y81C. Measurements were performed at different concentrations of dextran 20. The errors of the quantum yield measurements are within 10 %.

**Table S3** Quantum yields and fluorescence lifetimes of BODIPY at different dextran concentrations.

| [Dextran]<br>(mg/mL) | W39F/K74C |                              |                              |             |                              |                              | W39F/Q10C |                              |                              |             |                              |                              |
|----------------------|-----------|------------------------------|------------------------------|-------------|------------------------------|------------------------------|-----------|------------------------------|------------------------------|-------------|------------------------------|------------------------------|
|                      | Dextran   |                              |                              | Tyr-dextran |                              |                              | Dextran   |                              |                              | Tyr-dextran |                              |                              |
|                      | $\phi$    | $\langle\tau\rangle$<br>(ns) | $\tau_{\text{long}}$<br>(ns) | $\phi$      | $\langle\tau\rangle$<br>(ns) | $\tau_{\text{long}}$<br>(ns) | $\phi$    | $\langle\tau\rangle$<br>(ns) | $\tau_{\text{long}}$<br>(ns) | $\phi$      | $\langle\tau\rangle$<br>(ns) | $\tau_{\text{long}}$<br>(ns) |
| 0                    | 1.01      | 6.0                          | 6.0                          | 1.01        | 6.0                          | 6.0                          | 0.99      | 5.9                          | 6.2                          | 0.99        | 5.9                          | 6.2                          |
| 50                   | 1.02      | 6.0                          | 6.0                          | 0.96        | 5.7                          | 5.8                          | 0.98      | 5.8                          | 6.0                          | 0.72        | 5.5                          | 5.8                          |
| 100                  | 1.02      | 6.0                          | 6.0                          | 0.93        | 5.5                          | 5.6                          | 1.01      | 5.8                          | 6.0                          | 0.74        | 5.3                          | 5.6                          |
| 150                  | 1.00      | 6.0                          | 6.0                          | 0.88        | 5.4                          | 5.5                          | 1.03      | 5.8                          | 6.0                          | 0.76        | 5.3                          | 5.6                          |

| [Dextran]<br>(mg/mL) | W74C    |                              |                              |             |                              |                              |            |                              |                              |
|----------------------|---------|------------------------------|------------------------------|-------------|------------------------------|------------------------------|------------|------------------------------|------------------------------|
|                      | Dextran |                              |                              | Tyr-dextran |                              |                              | 1.5 mM Tyr |                              |                              |
|                      | $\phi$  | $\langle\tau\rangle$<br>(ns) | $\tau_{\text{long}}$<br>(ns) | $\phi$      | $\langle\tau\rangle$<br>(ns) | $\tau_{\text{long}}$<br>(ns) | $\phi$     | $\langle\tau\rangle$<br>(ns) | $\tau_{\text{long}}$<br>(ns) |
| 0                    | 0.96    | 6.2                          | 6.2                          | 0.96        | 6.2                          | 6.2                          | 0.98       | 6.0                          | 6.1                          |
| 12.5                 | -       | -                            | -                            | 0.56        | 5.3                          | 5.9                          | -          | -                            | -                            |
| 25                   | -       | -                            | -                            | 0.44        | 5.0                          | 5.9                          | -          | -                            | -                            |
| 50                   | 0.90    | 6.1                          | 6.1                          | 0.54        | 5.3                          | 5.9                          | 0.93       | 5.9                          | 6.0                          |
| 75                   | -       | -                            | -                            | 0.74        | 5.6                          | 5.8                          | -          | -                            | -                            |
| 100                  | 0.82    | 6.1                          | 6.1                          | 0.86        | 5.8                          | 5.9                          | -          | -                            | -                            |
| 150                  | 0.80    | 6.0                          | 6.1                          | 0.82        | 5.7                          | 5.9                          | -          | -                            | -                            |

The quantum yield ( $\phi$ ) together with the average fluorescence lifetime ( $\langle\tau\rangle$ ) and the long component lifetime ( $\tau_{\text{long}}$ ) analysed between 10 – 30 ns, for the two S16<sub>Meso</sub> variants W39F/K74C and W39F/Q10C as well as the S16<sub>Thermo</sub> mutant W74C. Measurements were performed at varying concentrations of dextran 20 and the tyrosine labelled dextran (Tyr-dextran). The errors of the quantum yield measurements are within 10 %. Also shown are the control data for W74C-BODIPY in presence of 1.5 mM free tyrosine.

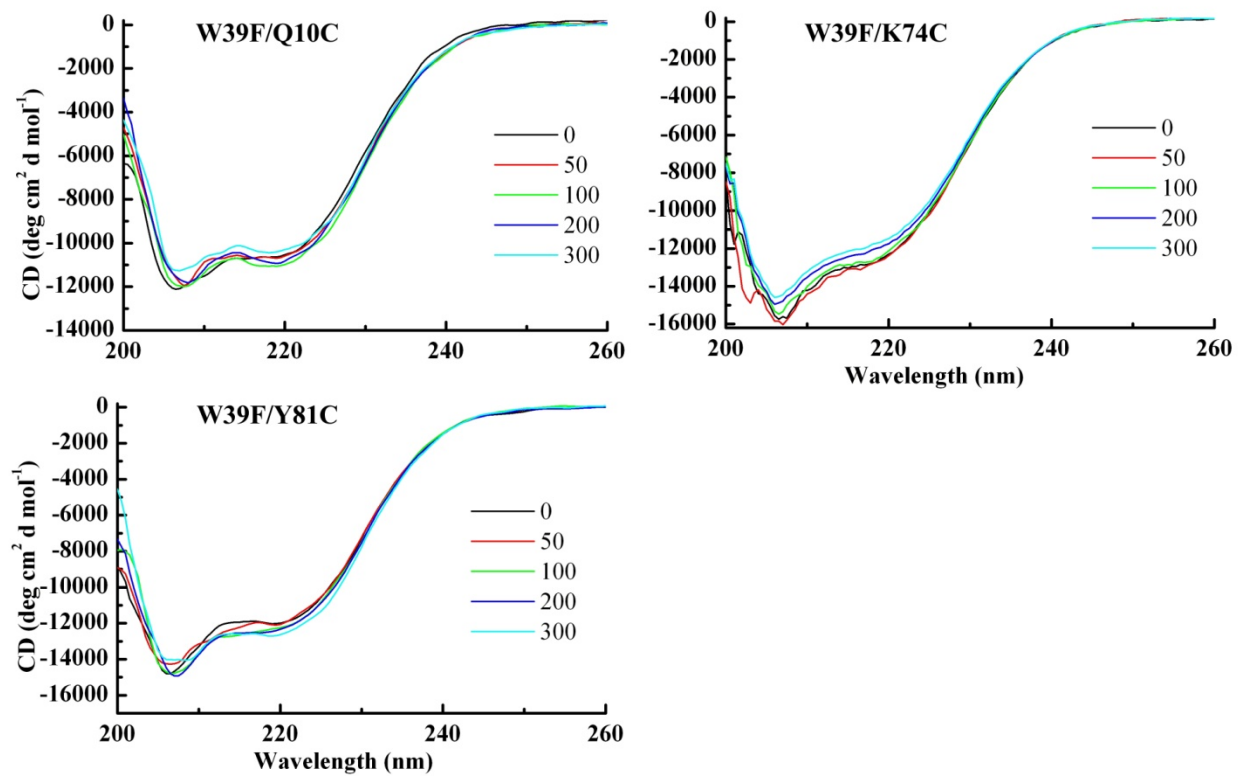

**Figure S1.** Far-UV CD spectra of the three S16<sub>Meso</sub> mutants at varying concentrations of dextran 20 (given in mg/mL in the panels with colour codes).

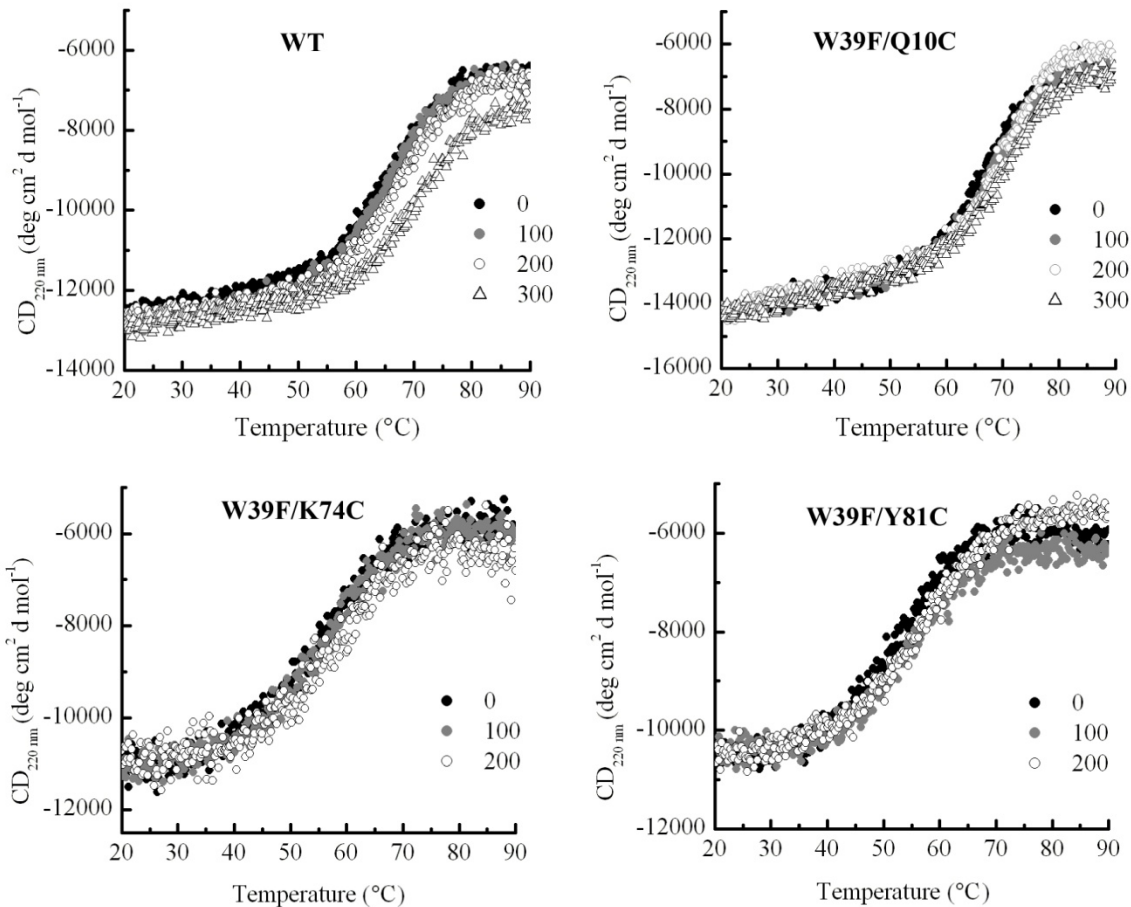

**Figure S2.** Thermal unfolding of S16<sub>Meso</sub>, at varying amounts of dextran 20 for wild-type (WT) and the three mutants W39F/Q10C, W39F/K74C and W39F/Y81C (amount of dextran 20 in mg/ml is given in the panels). The reversibility of unfolding was confirmed by the return of the negative CD signal at 220 nm after cooling. All thermal curves shown were reversible.

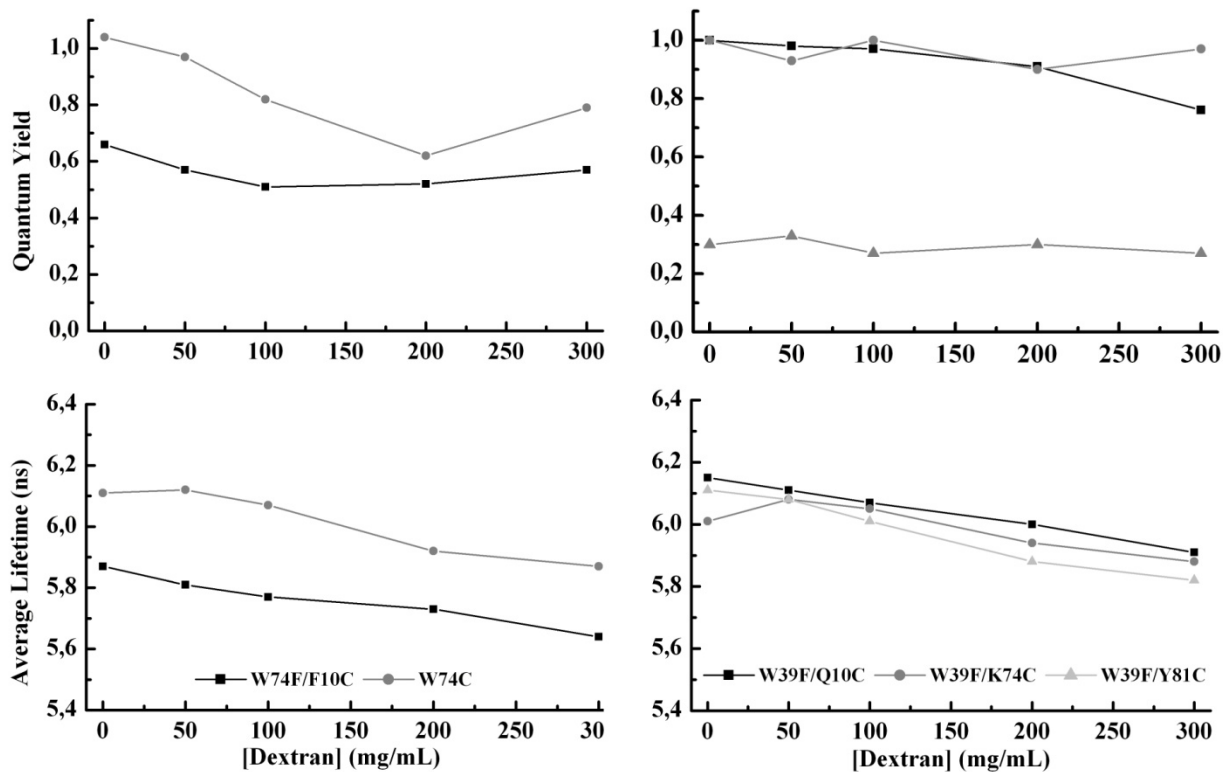

**Figure S3** Quantum yield (*upper panels*) and average fluorescence lifetimes (*lower panels*) of BODIPY in the two S16<sub>Thermo</sub> (*left panels*) and three S16<sub>Meso</sub> (*right panels*) variants at varying concentrations of dextran 20.

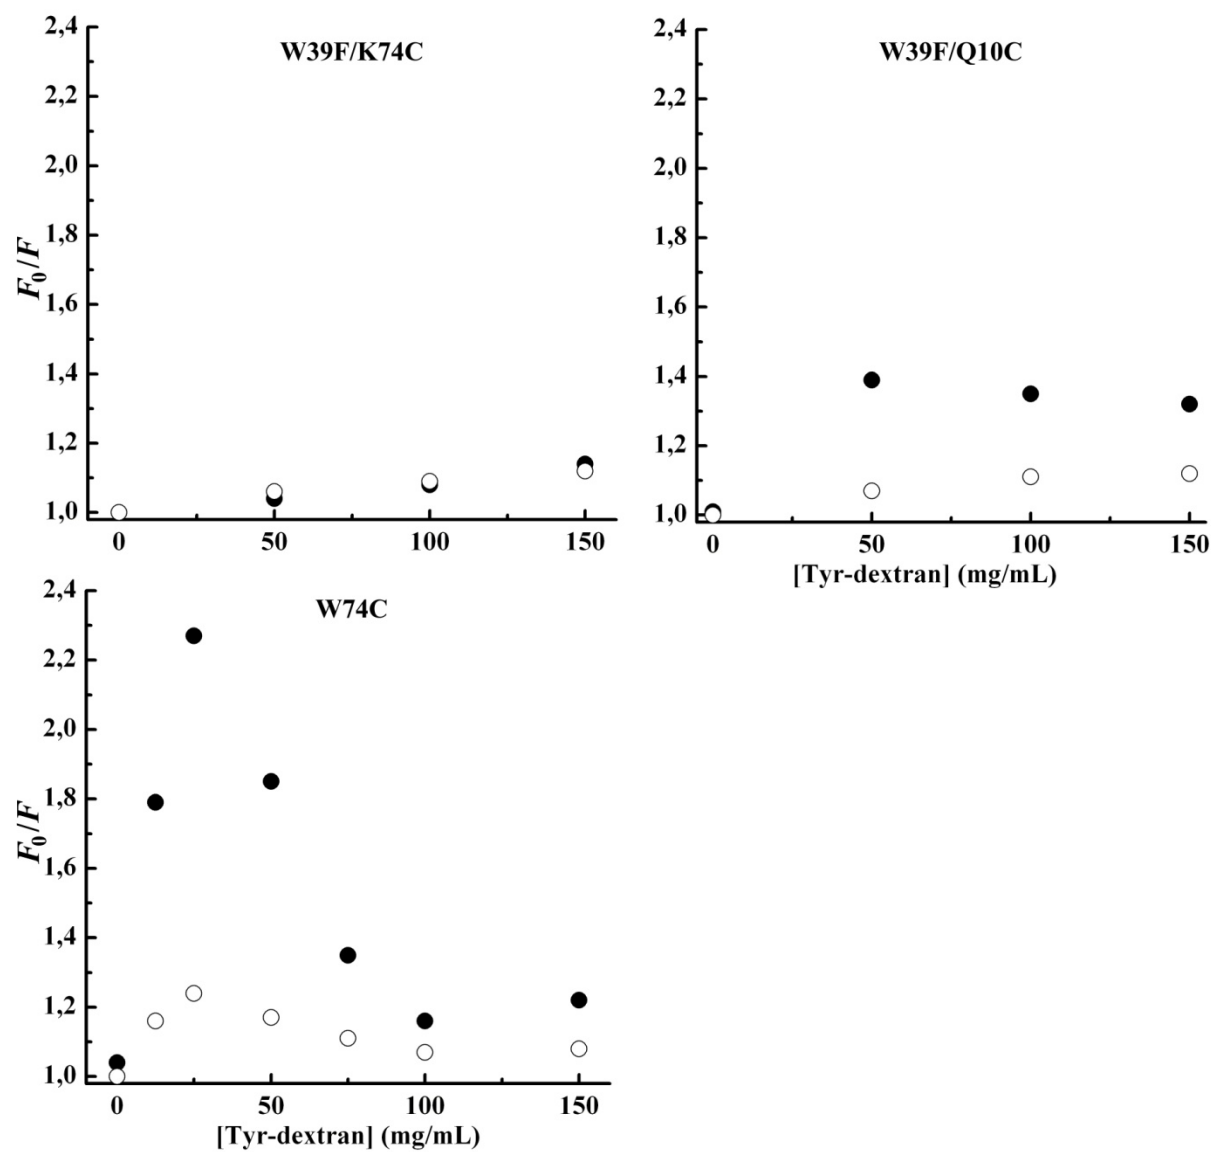

**Figure S4.** Stern-Volmer plots for three of the S16 variants, where the fluorescence intensity ratio  $F_0/F$  shows how  $\phi_0/\phi$  (o) and  $\tau_0/\tau$  (●) varies with the tyrosine-labelled dextran concentration.



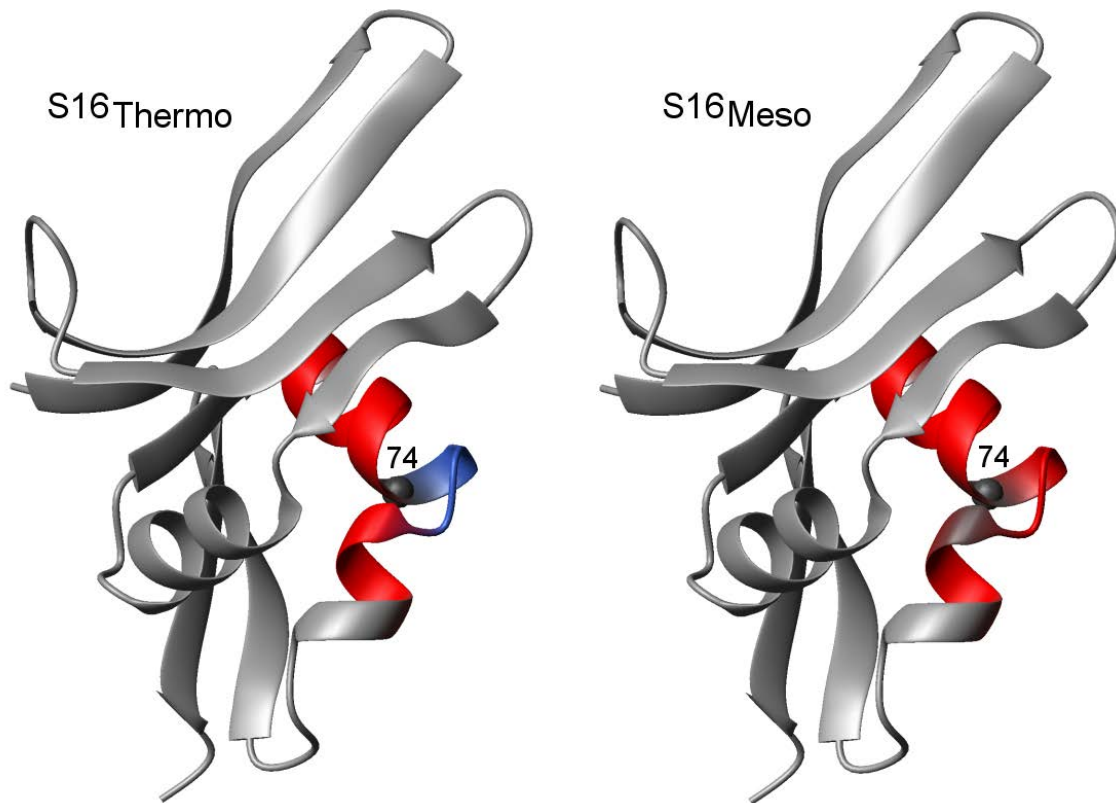

**Figure S5.** Sequential HN-HN NOE (Nuclear Overhauser Effect) contacts observed for residues 68 to 80 (Wallgren, M. et al., *Journal of Molecular Biology*, 2008. **379**(4): p. 845-858) plotted for both S16 homologs. Strong contacts are marked in red. The C $\alpha$  atom for residue 74 is shown as a grey sphere. Residues 74-76 show strong inter-NOE contacts for S16<sub>Meso</sub> but not in S16<sub>Thermo</sub> (blue) as indicated in the figure.
